# Supplementary material
Source: Springer Nature journal article supplement (https://www.springermedizin.de/resource/supplementary/13000_2013_1097_MOESM8_ESM.pdf/9625756)

# Ischemia

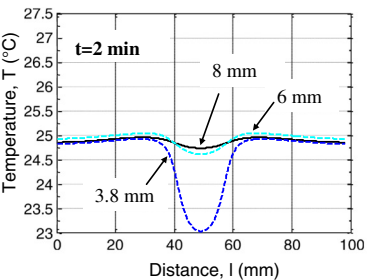

(a)

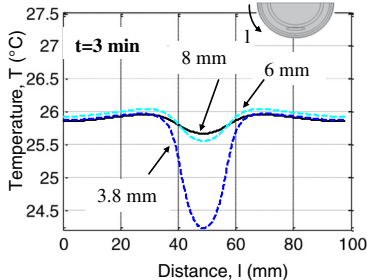

(b)

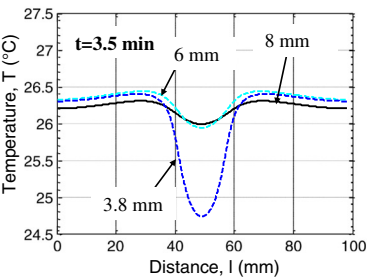

(c)

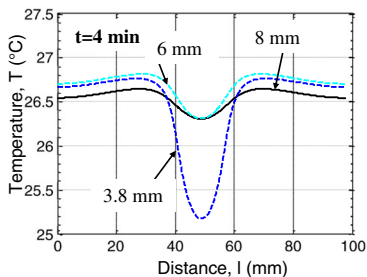

(d)

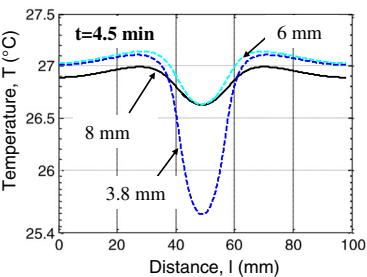

(e)

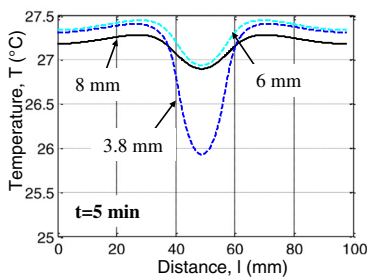

(f)

Supplement: MOESM8 [file 9625756]
